# Supplementary material
Source: publisher figshare collection journal article supplement (https://sage.figshare.com/ndownloader/files/22661390)
Supplement: Supplementary file 1 [file 22661390]

## E Figures. Diagrams of Patient Selection

eFigure 1. Patients with Intellectual/Developmental Disabilities (IDD) and Atherosclerotic Cardiovascular Disease (ASCVD) who used Beta-Blocker Therapy

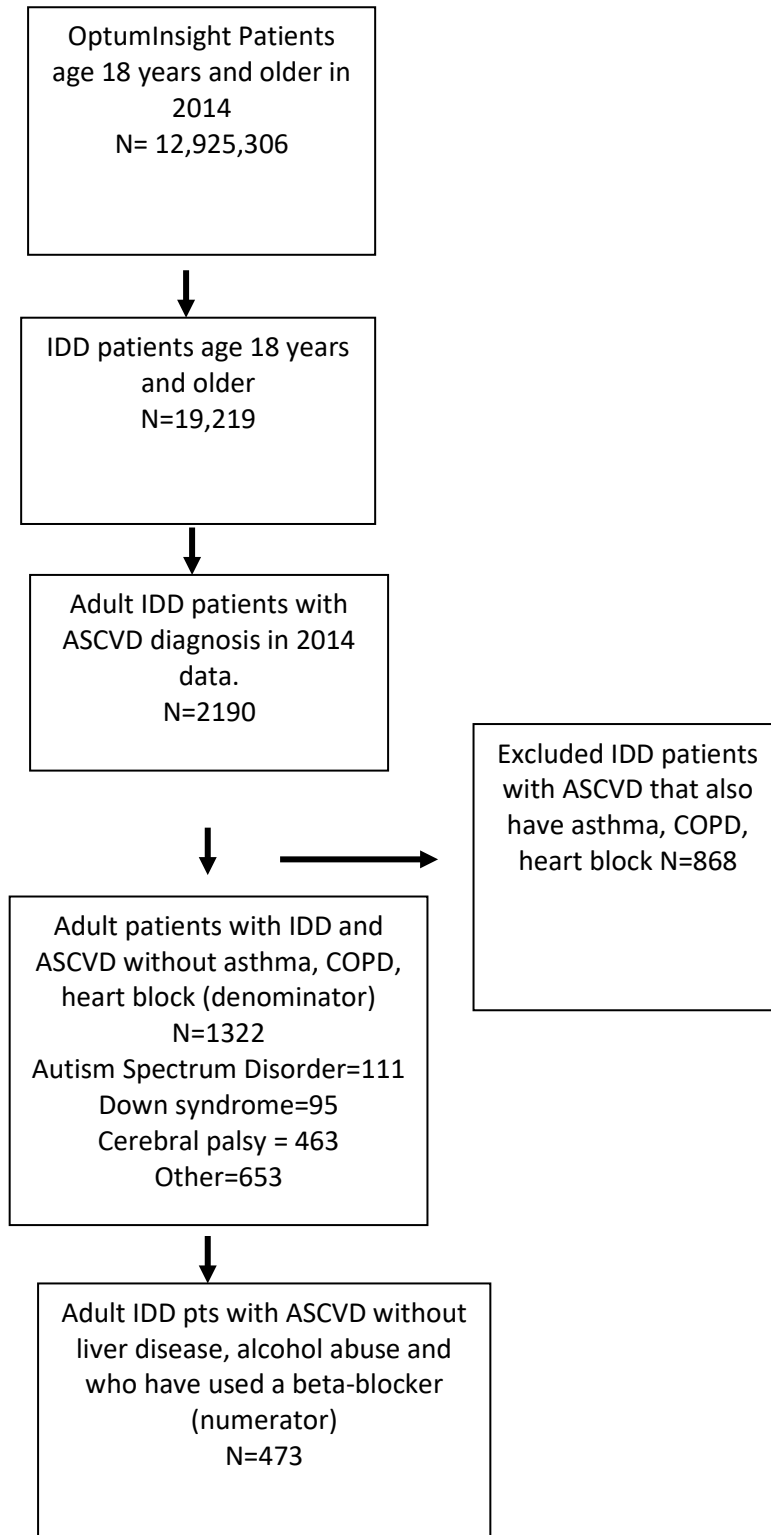

eFigure 2. Patients with Intellectual/Developmental Disabilities (IDD) and Atherosclerotic Cardiovascular Disease (ASCVD) who used Statin Therapy

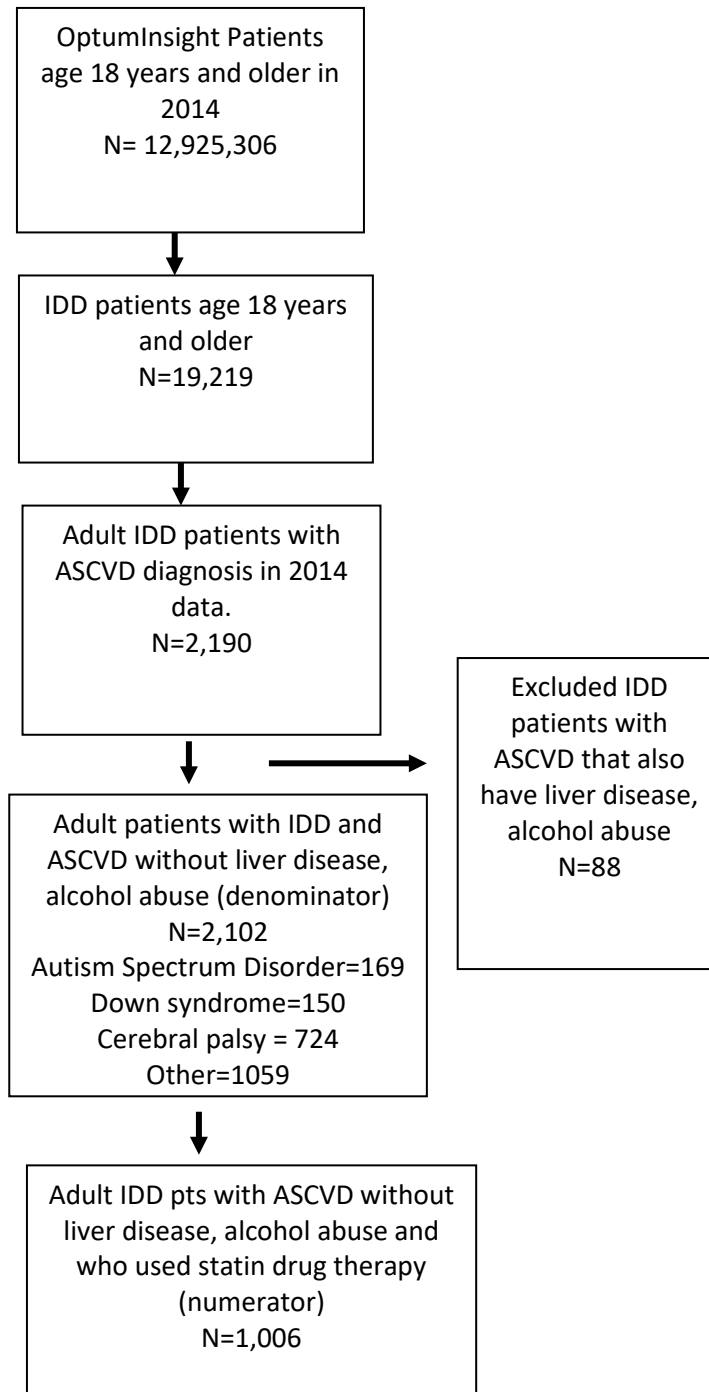

eFigure 3. Patients with Intellectual/Developmental Disabilities (IDD) and Atherosclerotic Cardiovascular Disease (ASCVD) who used Prescription Antiplatelet Therapy

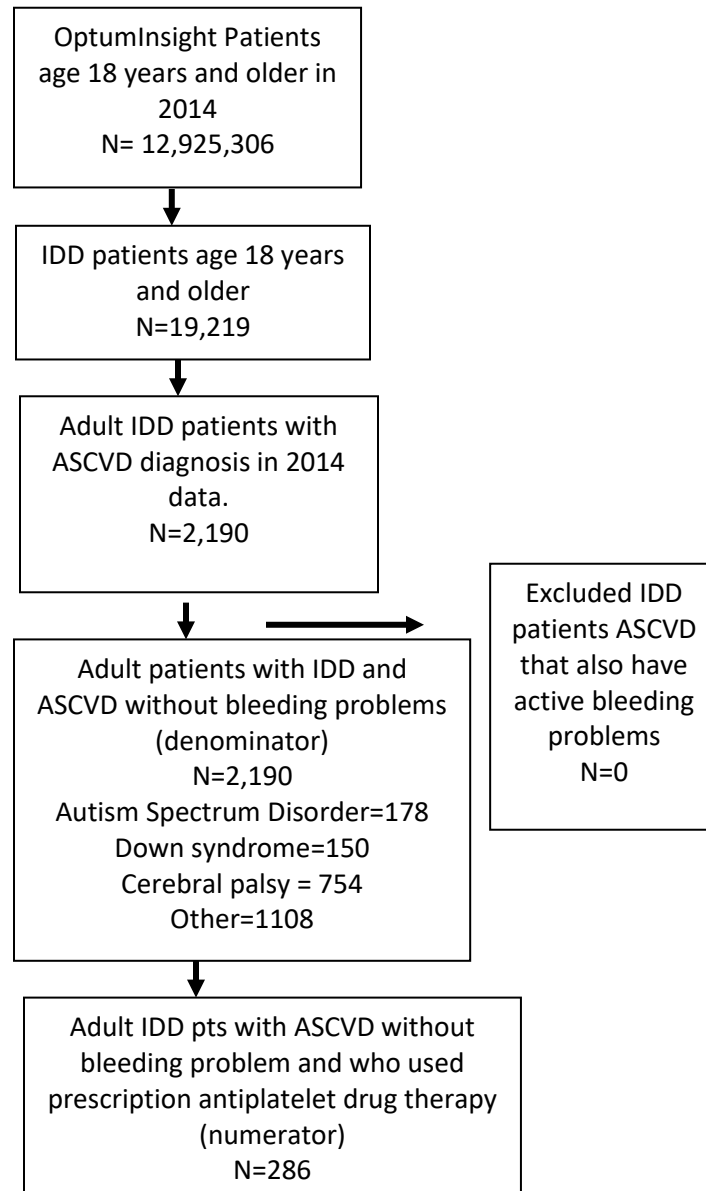

eFigure 4. Patients with Intellectual/Developmental Disabilities (IDD) and Heart Failure who used Beta-Blocker Therapy

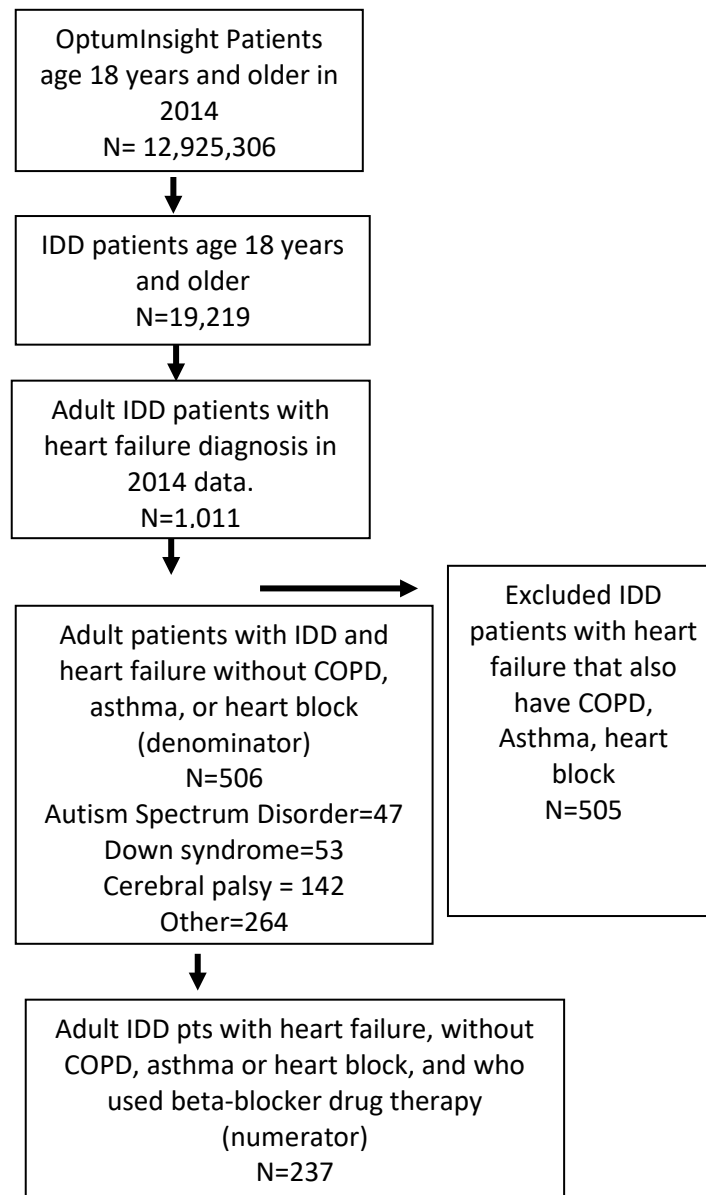

eFigure 5. Patients with Intellectual/Developmental Disabilities (IDD) and Heart Failure who used ACEi/ARB Therapy

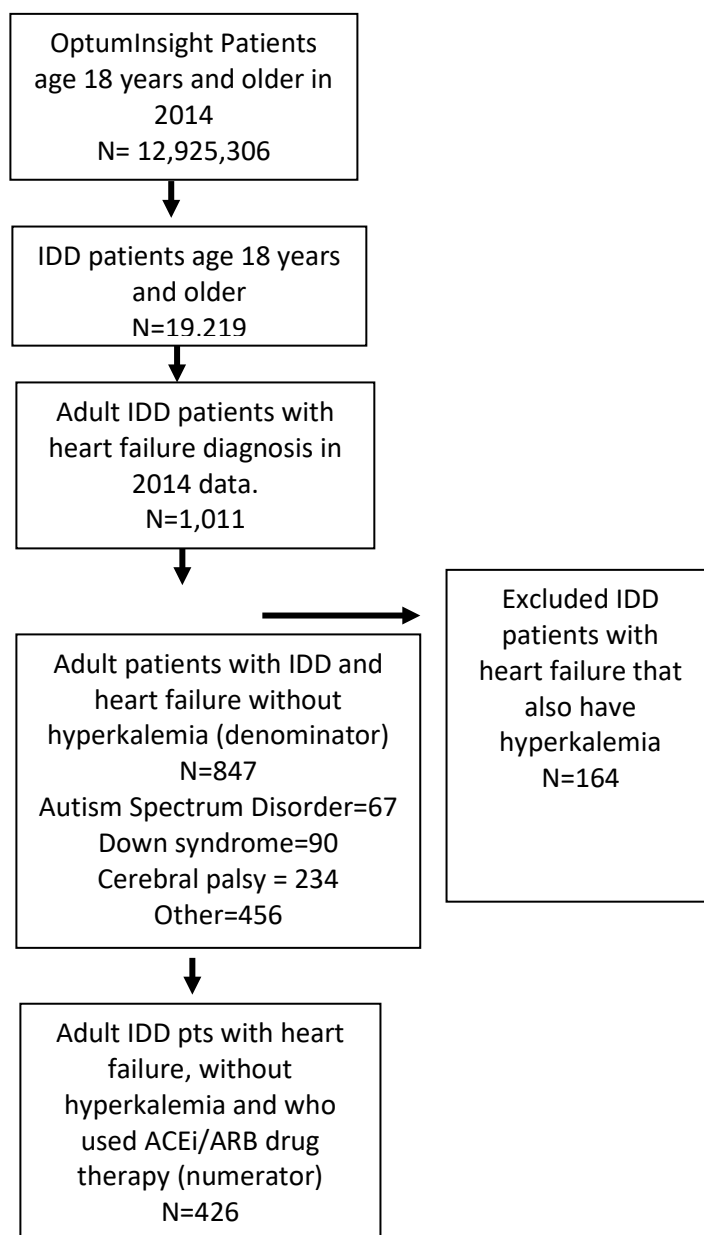

Figure E6. Non-IDD Patients with Atherosclerotic Cardiovascular Disease (ASCVD) who used Beta-Blocker Therapy

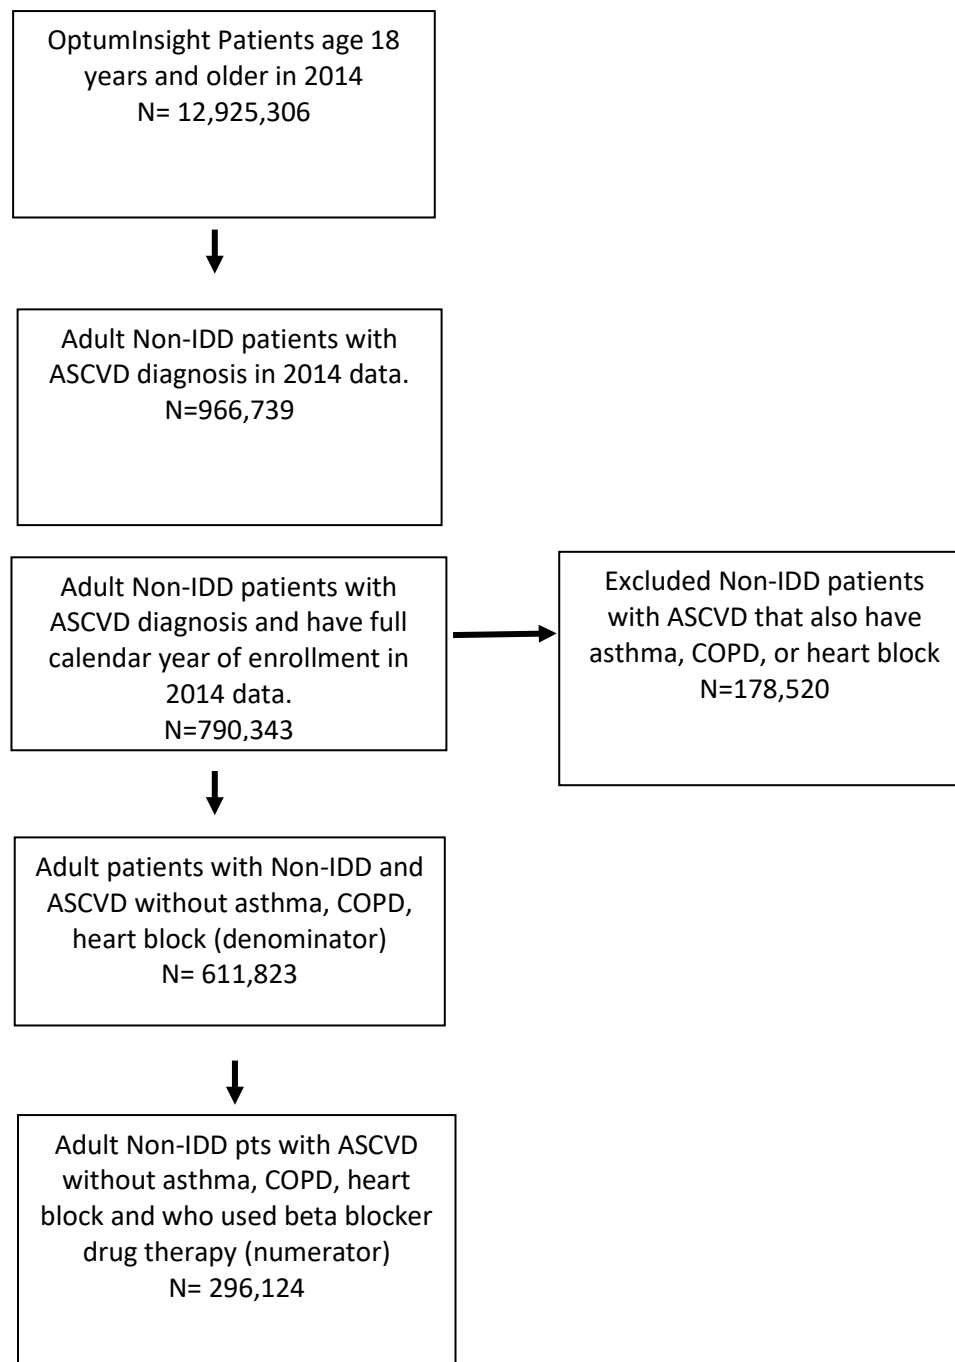

eFigure 7. Non-IDD Patients with Atherosclerotic Cardiovascular Disease (ASCVD) who used Statin Therapy

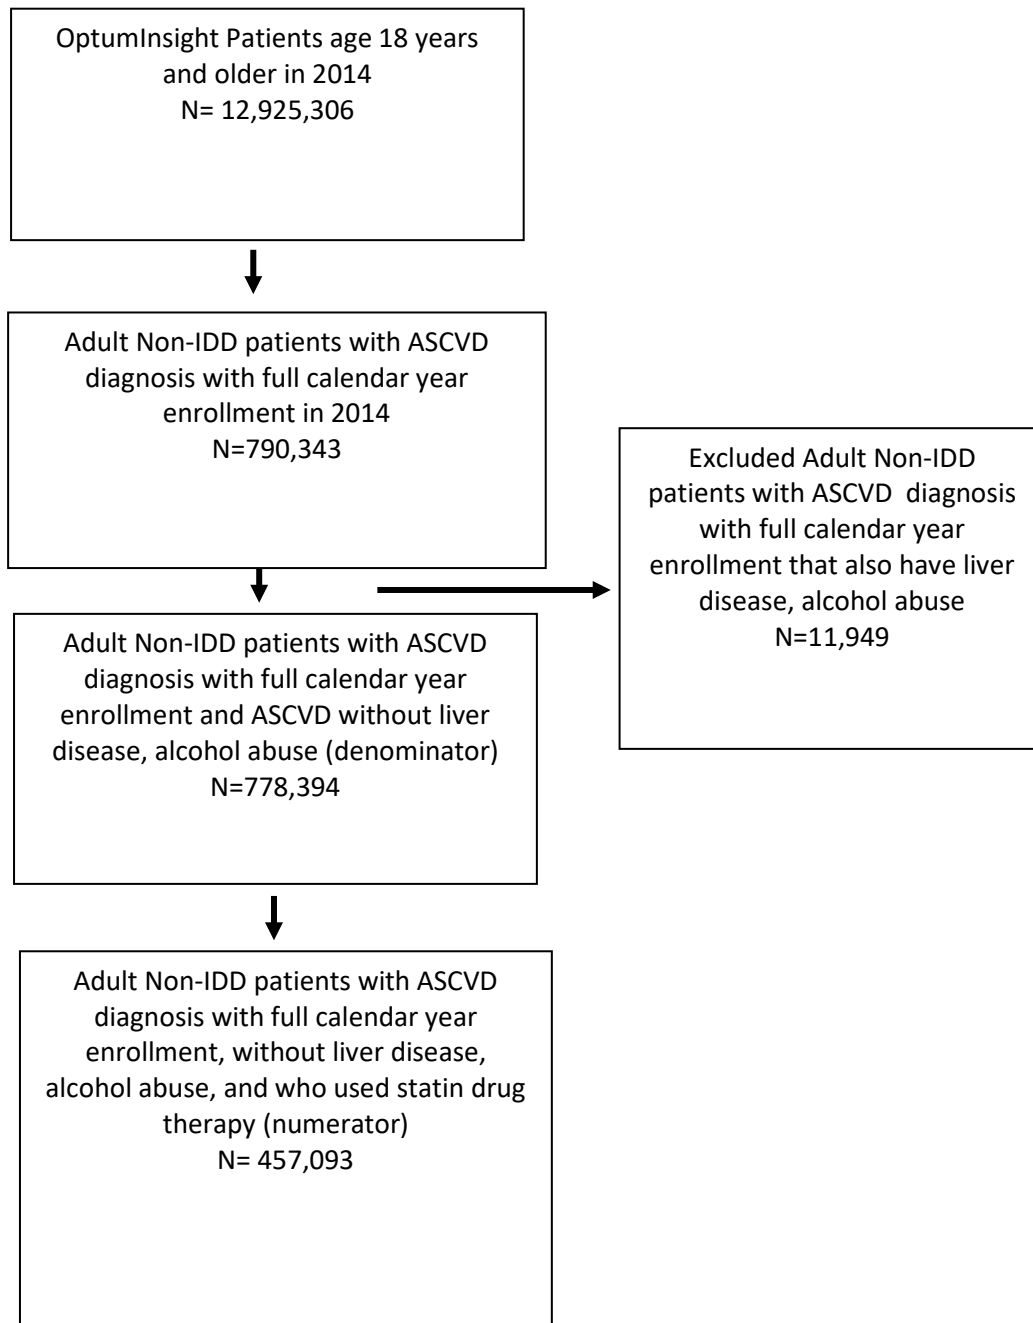



eFigure 8. Non-IDD Patients with Atherosclerotic Cardiovascular Disease (ASCVD) who used Prescription Antiplatelet Therapy

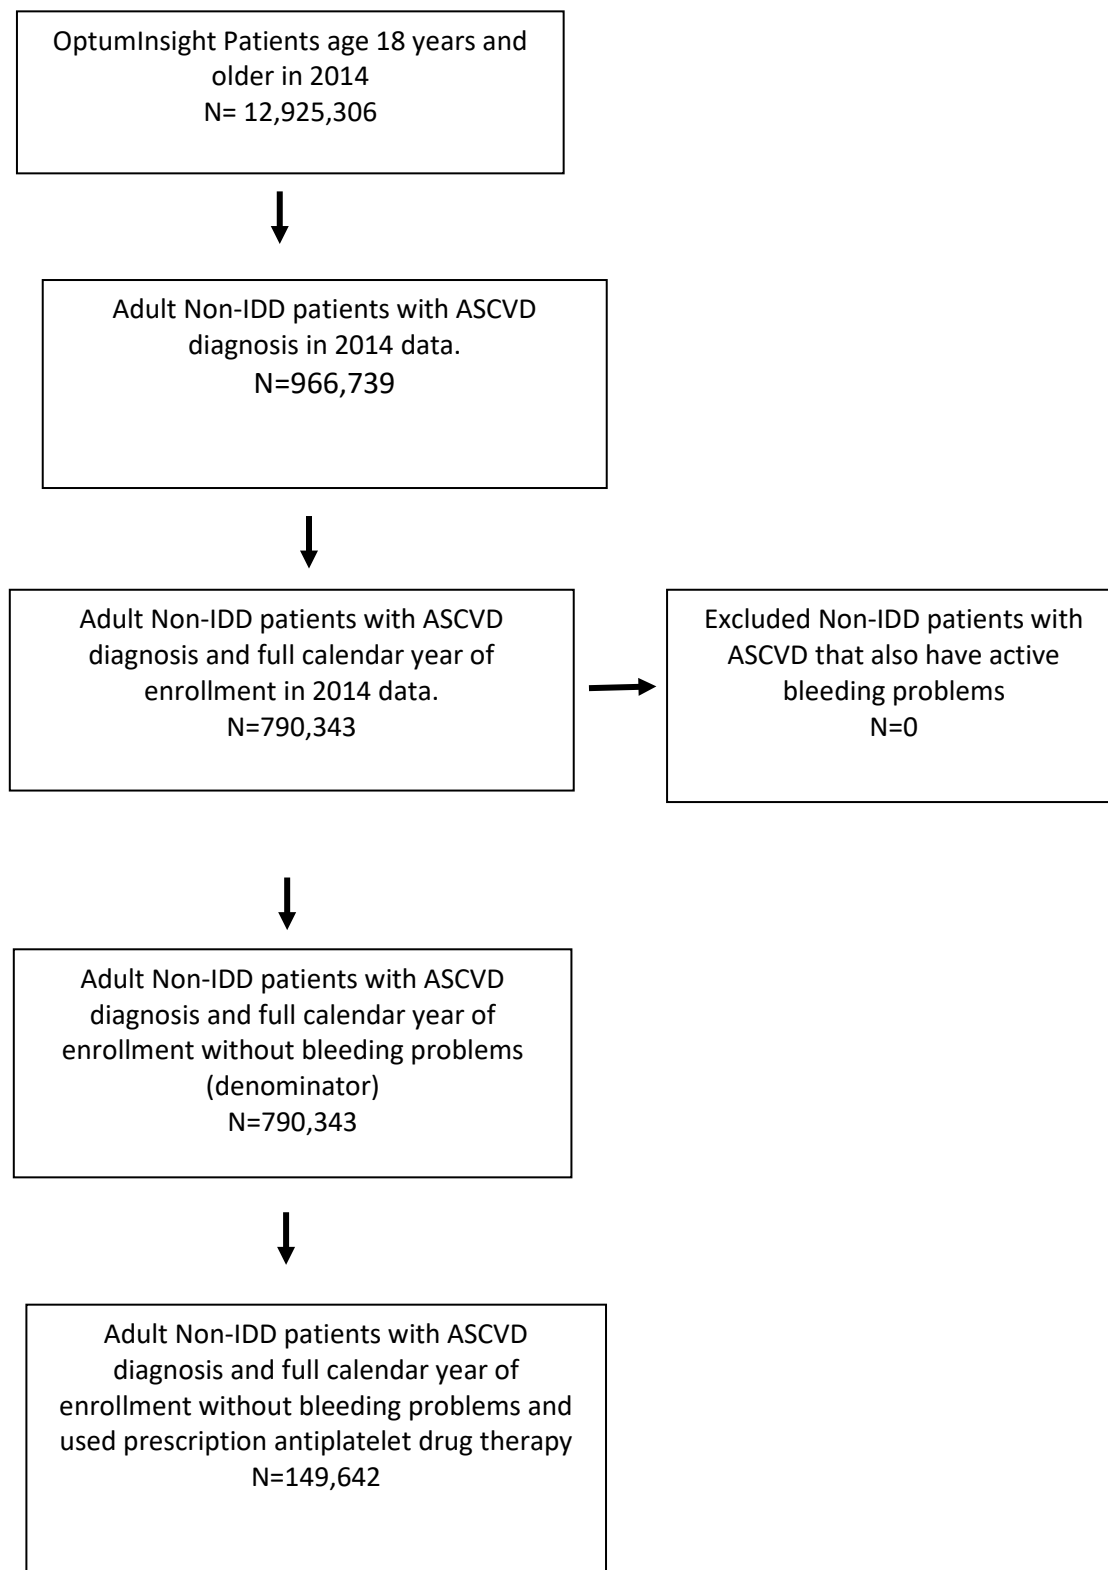

eFigure 9. Non-IDD Patients who had Heart Failure and were used Beta-Blocker Therapy

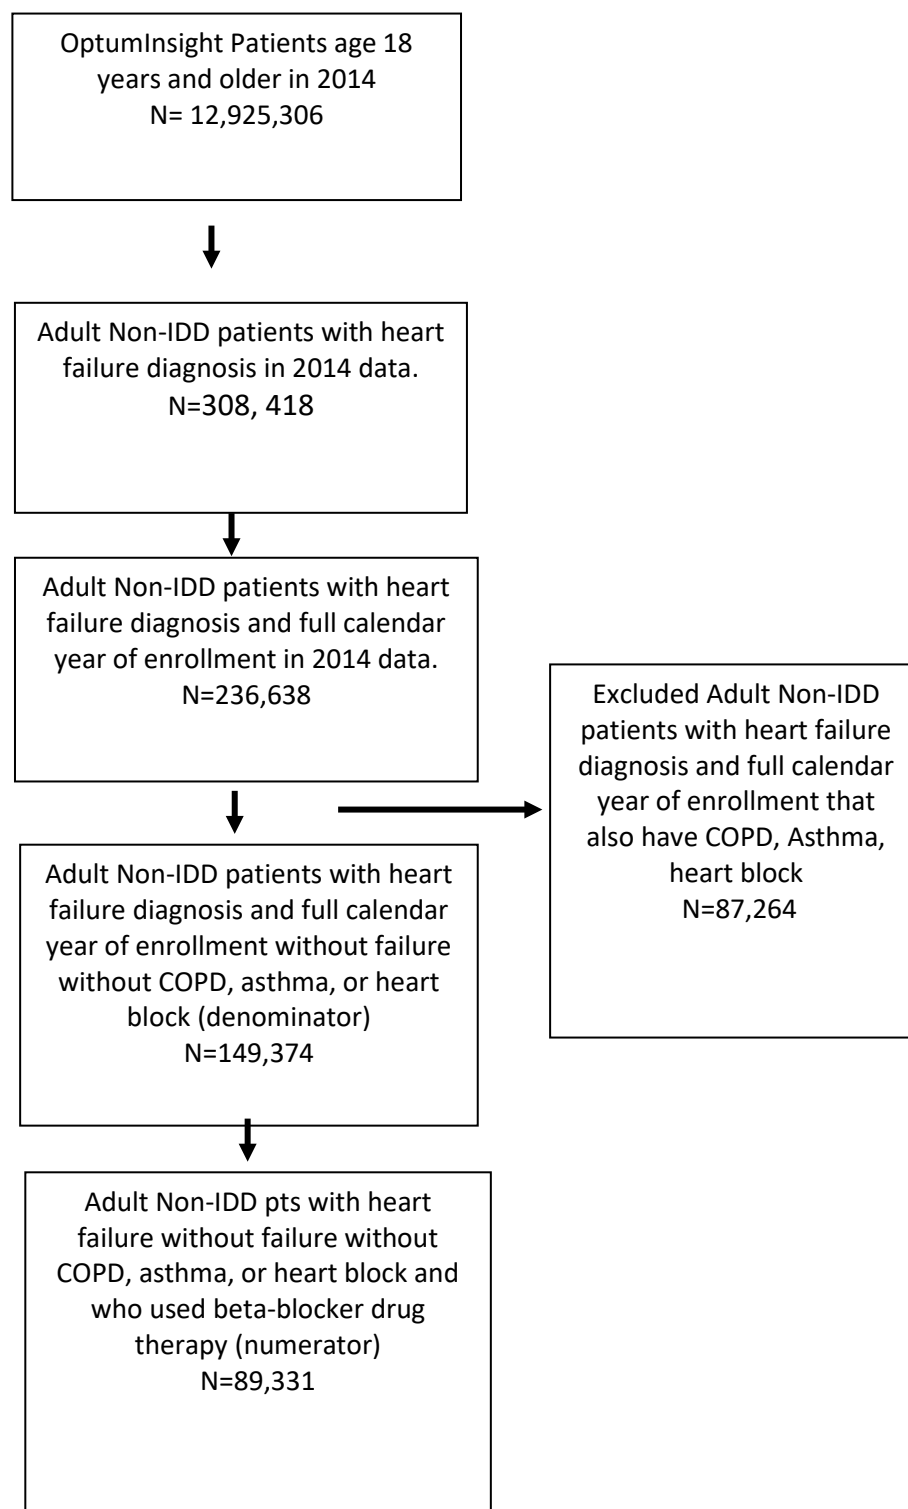

eFigure 10. Non-IDD Patients who had Systolic Heart Failure and who used ACEi/ARB Therapy

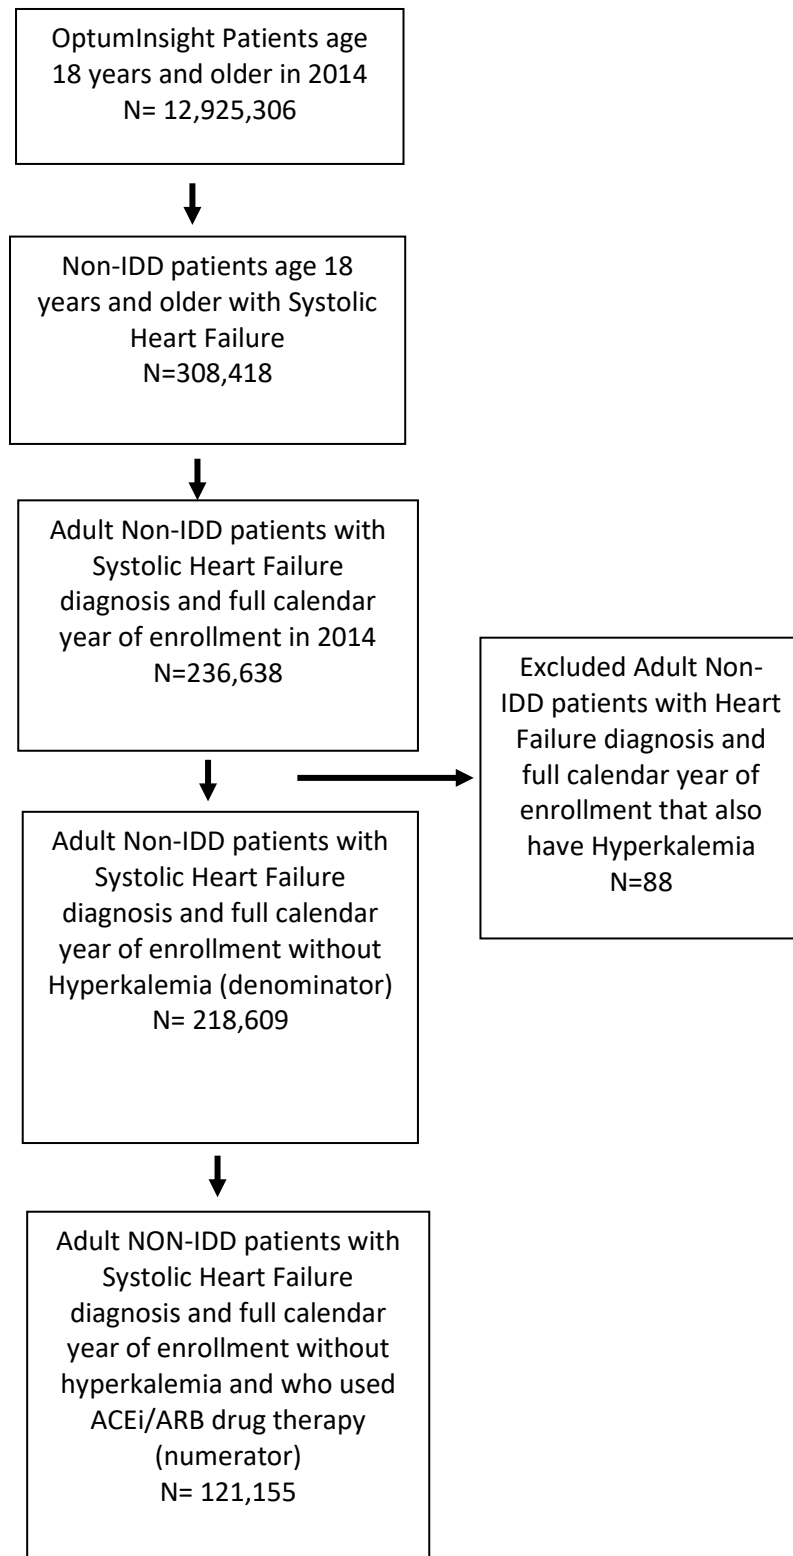

## Appendix

eTable 1. ICD9 Codes used to Identify Patients with Selected Conditions

| Condition                              | ICD-9-CM Code              | Clinical Description                                             |
|----------------------------------------|----------------------------|------------------------------------------------------------------|
| Atherosclerotic Cardiovascular Disease | 414.0                      | Coronary atherosclerosis                                         |
|                                        | 414.2                      | Chronic total occlusion of coronary artery                       |
|                                        | 414.8                      | Other specified forms of chronic ischemic heart disease          |
|                                        | 412                        | Old myocardial infarction                                        |
|                                        | 443.9                      | Peripheral vascular disease                                      |
|                                        | 413                        | Angina pectoris                                                  |
|                                        | 411                        | Intermediate coronary syndrome                                   |
|                                        | 410                        | Acute myocardial infarction                                      |
|                                        | 434.9                      | Cerebral thrombosis                                              |
|                                        | V12.54                     | Transient ischemic attack                                        |
|                                        | 414.2                      | Chronic total occlusion of coronary artery                       |
|                                        | 414.8                      | Other specified forms of chronic ischemic heart disease          |
|                                        | 428.0, 428.1, 428.2, 428.4 | Systolic heart failure or mixed systolic/diastolic heart failure |
|                                        |                            |                                                                  |
|                                        |                            |                                                                  |

|                                             |                     |                                     |
|---------------------------------------------|---------------------|-------------------------------------|
| Intellectual and Developmental Disabilities |                     |                                     |
| Autism Spectrum Disorder                    | 299-299.99          | Pervasive developmental disorders   |
| Down syndrome                               | 758.0               |                                     |
| Cerebral palsy                              | 343, 343.0-4, 343.9 |                                     |
| Other                                       | 317-317.99          | Mild mental retardation             |
|                                             | 318-318.99          | Other specified mental retardation  |
|                                             | 319-319.99          | Unspecified mental retardation      |
|                                             | 760.71              | Fetal alcohol disorder              |
|                                             | 759.81              | Prader-Willi syndrome               |
|                                             | 759.821             | De Lange syndrome                   |
|                                             | 759.827             | Seckel syndrome                     |
|                                             | 759.28              | Smith-Lemli-Opitz syndrome          |
|                                             | 759.83              | Fragile X syndrome                  |
|                                             |                     | Menkes disease, Laurence-Moon-Biedl |
|                                             | 759.89              | Taybi syndrome                      |

eTable 2. ICD9 Codes used to Identify Patients with Selected Contraindications used for Exclusion

| Measure                                           | ICD-9-CM      | Clinical Description                         |
|---------------------------------------------------|---------------|----------------------------------------------|
| ACEi/ARB for heart failure                        | 276.7         | Hyperkalemia                                 |
| ACEi/ARB for heart failure                        | 428.3         | Diastolic heart failure                      |
| Beta Blocker for heart failure                    | 428.3         | Diastolic heart failure                      |
| Beta Blocker for heart failure                    | 426           | Heart block                                  |
| Beta Blocker for heart failure                    | 493           | Asthma                                       |
| Beta Blocker for heart failure                    | 491.20-491.22 | Chronic obstructive pulmonary disease (COPD) |
| Beta Blocker for heart failure                    | 492.0-492.8   | Chronic obstructive pulmonary disease (COPD) |
| Antiplatelet therapy for ASCVD                    | 286           | Bleeding conditions                          |
| Antiplatelet therapy for ASCVD                    | 287           | Bleeding conditions                          |
| Beta Blocker for ASCVD                            | 426           | Heart block                                  |
| Beta Blocker for ASCVD                            | 493           | Asthma                                       |
| Beta Blocker for ASCVD                            | 491.20-491.22 | Chronic obstructive pulmonary disease (COPD) |
| Beta Blocker for ASCVD                            | 492.0-492.8   | Chronic obstructive pulmonary disease (COPD) |
| Statin for atherosclerotic cardiovascular disease | 571           | Liver disease                                |
| Statin for atherosclerotic cardiovascular disease | 305           | Alcohol abuse                                |

eTable 3. Multivariable Logistic Regression Analyses of Patients who have Atherosclerotic Cardiovascular Disease or Heart Failure for each of the Guideline Based Pharmacotherapy Medication Classes.

| Atherosclerotic Cardiovascular Disease Measures | Beta blocker        | Statin              | Anti-platelet       |
|-------------------------------------------------|---------------------|---------------------|---------------------|
|                                                 | <i>AOR (95% CI)</i> | <i>AOR (95% CI)</i> | <i>AOR (95% CI)</i> |
| IDD                                             | 0.65 (0.58,0.73)    | 0.73 (0.67,0.8)     | 0.64 (0.56,0.73)    |
| Non-IDD                                         |                     |                     |                     |
| Age in years                                    | 1 (1,1)             | 1 (1,1)             | 1 (1,1)             |
| Sex                                             |                     |                     |                     |
| Female                                          | 0.85 (0.84,0.86)    | 0.86 (0.85,0.87)    | 0.79 (0.78,0.8)     |
| Male                                            |                     |                     |                     |
| Race                                            |                     |                     |                     |
| Asian                                           | 0.99 (0.96,1.03)    | 1 (0.97,1.03)       | 1.2 (1.16,1.24)     |
| Black                                           | 1.06 (1.04,1.08)    | 1.08 (1.06,1.1)     | 1.06 (1.04,1.08)    |
| Hispanic                                        | 0.95 (0.93,0.96)    | 0.96 (0.95,0.98)    | 1.08 (1.06,1.1)     |
| Unknown/missing                                 | 0.89 (0.88,0.91)    | 0.89 (0.88,0.9)     | 0.98 (0.97,1)       |
| White                                           |                     |                     |                     |
| Region                                          |                     |                     |                     |
| Midwest                                         | 0.84 (0.83,0.85)    | 0.83 (0.82,0.84)    | 0.96 (0.94,0.97)    |
| Northeast                                       | 1.04 (1.02,1.06)    | 1.03 (1.01,1.04)    | 0.99 (0.97,1.01)    |
| South                                           | 1.05 (1.03,1.06)    | 1.04 (1.03,1.06)    | 1.18 (1.17,1.2)     |
| Unknown                                         | 1.05 (0.95,1.15)    | 1.05 (0.97,1.14)    | 1.08 (0.97,1.2)     |
| West                                            |                     |                     |                     |
| House hold income                               |                     |                     |                     |
| <\$40K                                          | 1.07 (1.05,1.09)    | 1.1 (1.08,1.12)     | 1.06 (1.03,1.08)    |
| \$40K-\$49K                                     | 1.16 (1.14,1.18)    | 1.15 (1.14,1.17)    | 1.18 (1.16,1.13)    |

|                               |                            |                            |                  |
|-------------------------------|----------------------------|----------------------------|------------------|
| \$50K-\$59K                   | 1.12 (1.09,1.14)           | 1.11 (1.09,1.13)           | 1.13 (1.1,1.16)  |
| \$60K-\$74K                   | 1.1 (1.08,1.13)            | 1.1 (1.08,1.13)            | 1.1 (1.07,1.13)  |
| \$75K-\$99K                   | 1.1 (1.08,1.13)            | 1.1 (1.08,1.12)            | 1.08 (1.06,1.11) |
| <\$40K                        | 1.07 (1.05,1.09)           | 1.1 (1.08,1.12)            | 1.06 (1.03,1.08) |
| Unknown                       | 0.83 (0.82,0.85)           | 0.84 (0.83,0.86)           | 0.93 (0.92,0.95) |
| \$100K+                       |                            |                            |                  |
| Elixhauser comorbidity index  |                            |                            |                  |
| Comorbidity index 0 to 4      | 0.44 (0.43,0.45)           | 0.43 (0.43,0.44)           | 0.71 (0.7,0.73)  |
| Comorbidity index 5 to 9      | 0.64 (0.63,0.66)           | 0.64 (0.63,0.65)           | 0.83 (0.82,0.85) |
| Comorbidity index 10 or more  |                            |                            |                  |
|                               |                            |                            |                  |
|                               |                            |                            |                  |
| <b>Heart Failure Measures</b> | <b>Beta blocker</b>        | <b>ACEi/ARB</b>            |                  |
|                               | <b><i>AOR (95% CI)</i></b> | <b><i>AOR (95% CI)</i></b> |                  |
| IDD                           | 0.66 (0.55,0.79)           | 0.87 (0.76,1.003)          |                  |
| Non-IDD                       |                            |                            |                  |
| Age                           | 1 (1,1)                    | 0.98 (0.98,0.98)           |                  |
| Sex                           |                            |                            |                  |
| Female                        | 0.89 (0.88,0.91)           | 0.96 (0.94,0.97)           |                  |
| Male                          |                            |                            |                  |
| Race                          |                            |                            |                  |
| Asian                         | 1.02 (0.94,1.1)            | 1.32 (1.24,1.41)           |                  |
| Black                         | 1.2 (1.16,1.25)            | 1.38 (1.34,1.43)           |                  |
| Hispanic                      | 1.08 (1.03,1.12)           | 1.45 (1.4,1.49)            |                  |
| Unknown/missing               | 0.86 (0.84,0.89)           | 0.94 (0.91,0.96)           |                  |
| White                         |                            |                            |                  |
| Region                        |                            |                            |                  |
| Midwest                       | 0.67 (0.65,0.69)           | 0.63 (0.61,0.64)           |                  |



|                              |                  |                  |  |
|------------------------------|------------------|------------------|--|
| Northeast                    | 0.92 (0.89,0.95) | 0.81 (0.79,0.84) |  |
| South                        | 1 (0.97,1.03)    | 0.98 (0.96,1)    |  |
| Unknown                      | 1 (0.84,1.19)    | 0.76 (0.66,0.84) |  |
| West                         |                  |                  |  |
| House hold income            |                  |                  |  |
| <\$40K                       | 1.14 (1.1,1.18)  | 1.16 (1.13,1.19) |  |
| \$40K-\$49K                  | 1.09 (1.04,1.15) | 1.08 (1.04,1.12) |  |
| \$50K-\$59K                  | 1.12 (1.07,1.18) | 1.11 (1.07,1.15) |  |
| \$60K-\$74K                  | 1.09 (1.04,1.14) | 1.06 (1.02,1.1)  |  |
| \$75K-\$99K                  | 1.09 (1.05,1.14) | 1.07 (1.04,1.11) |  |
| Unknown                      | 0.8 (0.77,0.83)  | 0.81 (0.79,0.84) |  |
| \$100K+                      |                  |                  |  |
| Elixhauser comorbidity index |                  |                  |  |
| Comorbidity index 0 to 4     | 0.56 (0.54,0.58) | 0.78 (0.76,0.8)  |  |
| Comorbidity index 5 to 9     | 0.78 (0.75,0.8)  | 1.01 (0.99,1.03) |  |
| Comorbidity index 10 or more |                  |                  |  |

eTable 4. Multivariable Logistic Regression Analyses of Only Patients who have Intellectual/Developmental Disabilities and either Atherosclerotic Cardiovascular Disease or Heart Failure for each of the Guideline Based Pharmacotherapy Medication Classes.

| <b>Atherosclerotic Cardiovascular Disease Measures</b>                   | <b>Beta blocker</b> | <b>Statin</b>      | <b>Anti-platelet</b> |
|--------------------------------------------------------------------------|---------------------|--------------------|----------------------|
| Effect                                                                   | <b>AOR (95%CI)</b>  | <b>AOR (95%CI)</b> | <b>AOR (95%CI)</b>   |
| IDD type                                                                 |                     |                    |                      |
| Cerebral palsy                                                           | 0.53 (0.34,0.84)    | 0.78 (0.55,1.1)    | 0.96 (0.59,1.58)     |
| Down syndrome                                                            | 0.26 (0.13,0.51)    | 0.51 (0.32,0.8)    | 0.66 (0.32,1.38)     |
| Other                                                                    | 0.54 (0.35,0.84)    | 0.8 (0.58,1.12)    | 0.97 (0.6,1.56)      |
| Pervasive developmental disorders – autism spectrum disorder (reference) |                     |                    |                      |
| Age                                                                      | 1.03 (1.02,1.04)    | 1.02 (1.01,1.02)   | 1.02 (1.01,1.03)     |
| Sex                                                                      |                     |                    |                      |
| Female                                                                   | 0.65 (0.51,0.83)    | 0.82 (0.69,0.98)   | 2.36 (1.13,4.96)     |
| Male (reference)                                                         |                     |                    |                      |
| Race                                                                     |                     |                    |                      |
| Asian                                                                    | 0.98 (0.38,2.51)    | 1.25 (0.68,2.32)   | 0.86 (0.55,1.35)     |
| Black                                                                    | 1.13 (0.76,1.69)    | 1.22 (0.9,1.66)    | 0.68 (0.37,1.24)     |
| Hispanic                                                                 | 1.12 (0.67,1.87)    | 1.27 (0.87,1.85)   | 0.86 (0.61,1.21)     |
| Unknown/missing                                                          | 1.15 (0.85,1.55)    | 0.94 (0.75,1.17)   | 0.73 (0.56,0.95)     |
| White (reference)                                                        |                     |                    |                      |
| Region of United States                                                  |                     |                    |                      |
| Midwest                                                                  | 1.01 (0.7,1.44)     | 1.19 (0.91,1.54)   | 0.80 (0.54,1.18)     |
| Northeast                                                                | 1.00 (0.67,1.48)    | 1.10 (0.83,1.46)   | 0.65 (0.42,1.00)     |
| South                                                                    | 1.30 (0.91,1.84)    | 1.12 (0.86,1.45)   | 0.97 (0.67,1.41)     |
| West (reference)                                                         |                     |                    |                      |
| House hold income                                                        |                     |                    |                      |
| \$40K-\$49K                                                              | 0.87 (0.51,1.47)    | 1.05 (0.72,1.52)   | 0.99 (0.59,1.69)     |

|                                                                         |                                   |                               |                  |
|-------------------------------------------------------------------------|-----------------------------------|-------------------------------|------------------|
| \$50K-\$59K                                                             | 1.65 (0.88,3.06)                  | 1.23 (0.78,1.92)              | 0.87 (0.45,1.68) |
| \$60K-\$74K                                                             | 0.95 (0.54,1.67)                  | 1.18 (0.79,1.75)              | 0.67 (0.37,1.23) |
| <\$40K                                                                  | 1.07 (0.66,1.71)                  | 1.42 (1.01,1.99)              | 1.13 (0.70,1.81) |
| Unknown/missing                                                         | 0.81 (0.52,1.25)                  | 0.96 (0.7,1.31)               | 0.73 (0.47,1.14) |
| \$75K-\$99K (reference)                                                 |                                   |                               |                  |
| Elixhauser Comorbidity Index                                            |                                   |                               |                  |
| Comorbidity index 0-4                                                   | 0.26 (0.17,0.39)                  | 0.55 (0.42,0.72)              | 0.43 (0.29,0.63) |
| Comorbidity index 5-9                                                   | 0.47 (0.32,0.68)                  | 0.69 (0.54,0.88)              | 0.72 (0.52,0.99) |
| Comorbidity index 10 or more (reference)                                |                                   |                               |                  |
|                                                                         |                                   |                               |                  |
| <b>Heart Failure Measures</b>                                           | <b>Proportion on beta blocker</b> | <b>Proportion on ACEi/ARB</b> |                  |
| Effect                                                                  | AOR (95%CI)                       | AOR (95%CI)                   |                  |
| IDD type                                                                |                                   |                               |                  |
| Cerebral palsy                                                          | 0.51 (0.25,1.03)                  | 0.66 (0.37,1.17)              |                  |
| Down syndrome                                                           | 0.34 (0.14,0.82)                  | 0.33 (0.16,0.66)              |                  |
| Other                                                                   | 0.94 (0.48,1.82)                  | 0.85 (0.49,1.46)              |                  |
| Pervasive developmental disorders -autism spectrum disorder (reference) |                                   |                               |                  |
| Age                                                                     | 1.03 (1.01,1.04)                  | 1.02 (1.01,1.03)              |                  |
| Sex                                                                     |                                   |                               |                  |
| Female                                                                  | 0.46 (0.31,0.68)                  | 0.9 (0.68,1.21)               |                  |
| Male (reference)                                                        |                                   |                               |                  |
| Race                                                                    |                                   |                               |                  |
| Asian                                                                   | 0.82 (0.12,5.7)                   | 3.82 (0.94,15.49)             |                  |
| Black                                                                   | 1.29 (0.69,2.42)                  | 1.93 (1.19,3.13)              |                  |
| Hispanic                                                                | 1.42 (0.68,2.99)                  | 0.99 (0.53,1.82)              |                  |
| Unknown/missing                                                         | 0.91 (0.56,1.48)                  | 0.90 (0.62,1.28)              |                  |
| White (reference)                                                       |                                   |                               |                  |
| Region of the United States                                             |                                   |                               |                  |
| Midwest                                                                 | 1.01 (0.56,1.84)                  | 1.18 (0.76,1.84)              |                  |
| Northeast                                                               | 0.92 (0.5,1.71)                   | 1.03 (0.65,1.62)              |                  |
| South                                                                   | 1.12 (0.62,2.02)                  | 0.97 (0.63,1.49)              |                  |
| West (reference)                                                        |                                   |                               |                  |
| Household Income                                                        |                                   |                               |                  |
| \$40K-\$49K                                                             | 0.97 (0.41,2.33)                  | 1.82 (0.96,3.47)              |                  |
| \$50K-\$59K                                                             | 0.85 (0.32,2.25)                  | 0.58 (0.27,1.23)              |                  |
| \$60K-\$74K                                                             | 0.68 (0.27,1.69)                  | 1.49 (0.75,2.94)              |                  |
| <\$40K                                                                  | 1.37 (0.64,2.92)                  | 1.9 (1.07,3.4)                |                  |
| Unknown/missing                                                         | 0.73 (0.37,1.43)                  | 1.2 (0.71,2.04)               |                  |

|                                          |                  |                  |  |
|------------------------------------------|------------------|------------------|--|
| \$75K-\$99K                              |                  |                  |  |
| Elixhauser comorbidity index             |                  |                  |  |
| Comorbidity index 0 - 4                  | 0.53 (0.29,0.97) | 0.53 (0.33,0.86) |  |
| Comorbidity index 5 - 9                  | 0.70 (0.45,1.08) | 0.58 (0.42,0.80) |  |
| Comorbidity index 10 or more (reference) |                  |                  |  |
